# Supplementary material for: In vivo uptake of antisense oligonucleotide drugs predicted by ab initio quantum mechanical calculations
Source: PubMed Central journal article supplement (PMC7973520; doi:10.1038/s41598-021-85453-6), 2021-03-18
Supplement: 41598_2021_85453_MOESM1_ESM.pdf [file 41598_2021_85453_MOESM1_ESM.pdf]

## SUPPLEMENTARY MATERIAL

### *In vivo* uptake of antisense oligonucleotide drugs predicted by *ab initio* quantum mechanical calculations

Henrik Frydenlund Hansen<sup>a</sup>, Nanna Albaek<sup>a</sup>, Bo Rode Hansen<sup>a</sup>, Irene Shim<sup>b</sup>,  
Henrik Bohr<sup>c\*</sup> and Troels Koch<sup>a</sup>

<sup>a</sup>Roche Innovation Center Copenhagen, Fremtidsvej 3, DK-2970 Hoersholm, Denmark

<sup>b</sup>Department of Chemistry, B-206-DTU, The Technical University of Denmark, DK-2800, Lyngby, Denmark

<sup>c</sup>Department of Chemical Engineering, B-229-DTU, The Technical University of Denmark

\*Correspondence should be addressed to: [hbohr@dtu.dk](mailto:hbohr@dtu.dk)

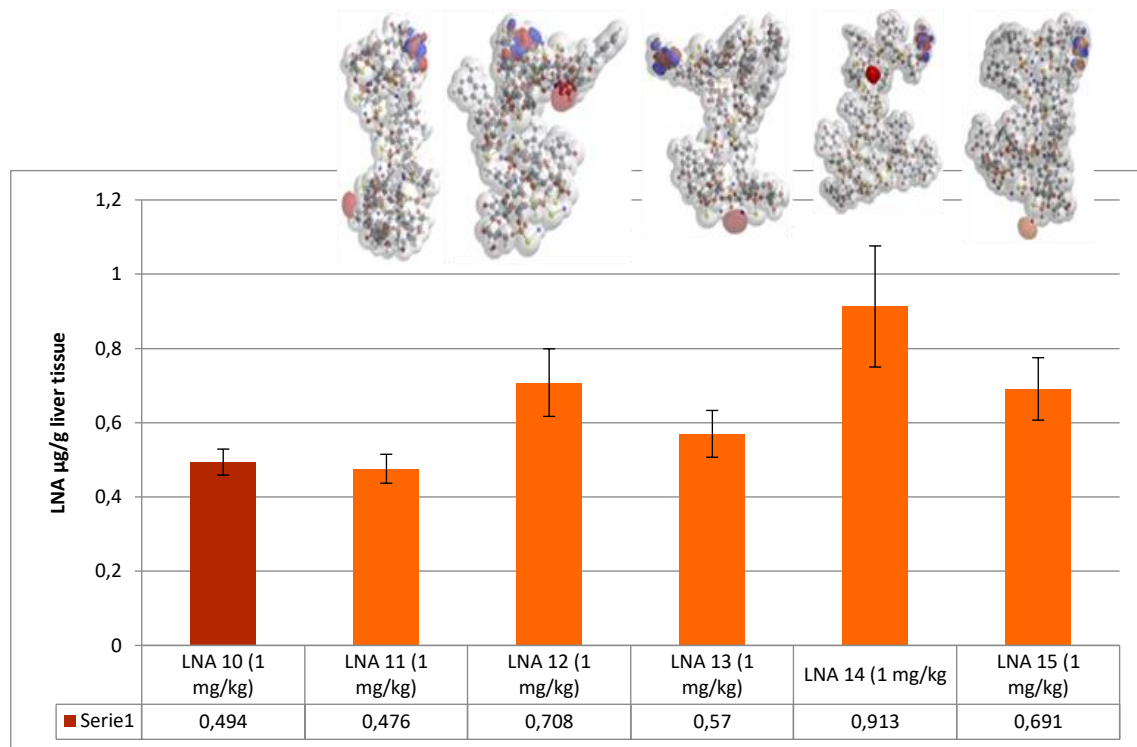

**Figure S1. Liver uptake of LNA diastereoisomers targeting Hif-1alpha.** Diversity of diastereoisomer effect on oligonucleotide concentration in liver of mice (C57BL/6qBom) (n=5) dosed once intravenously at 1 mg/kg on day 0 and taken down day 3. LNA oligonucleotide concentration ( $\mu\text{g/g}$  tissue) determined by hybridization-ELISA. Red, LNA 10, random mixture of stereoisomers. Orange, stereo-defined isomers with identical nucleobase sequence and design as LNA 10. Molecules created using Spartan 14,16 ([www.wavefun.com](http://www.wavefun.com)).

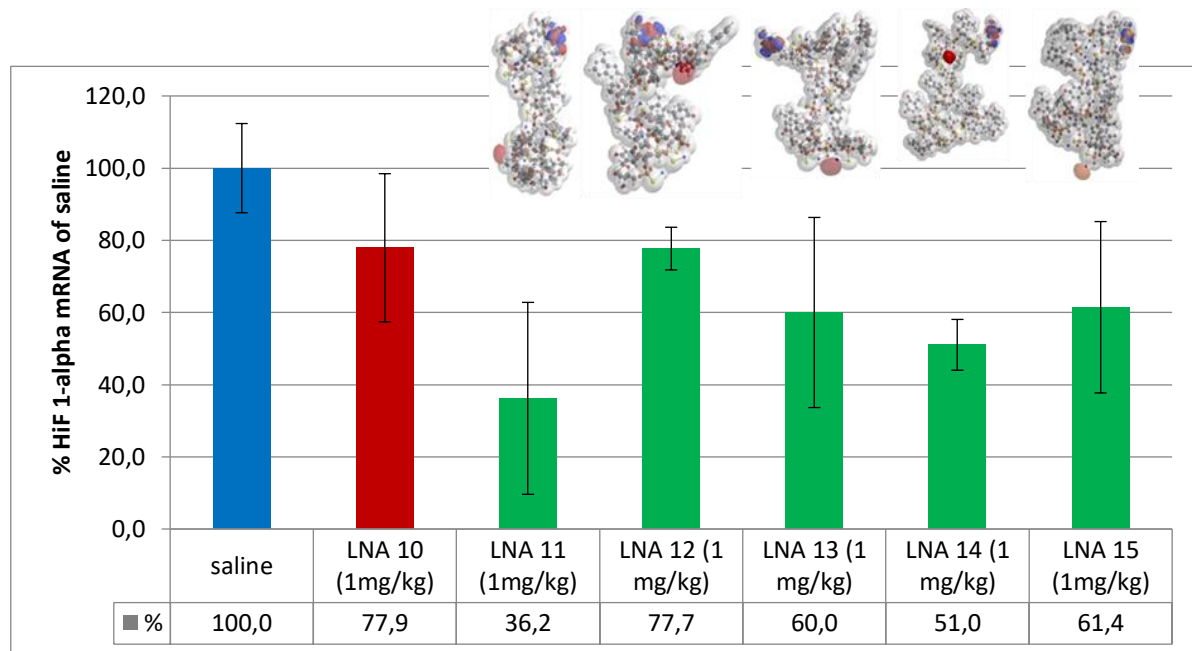

**Figure S2. Antisense activity of LNA diastereoisomers targeting Hif-1 alpha.** Diversity of diastereoisomer on target downregulation (Hif-1alpha) in livers of mice (C57BL/6qBom) (n=5) dosed once intravenously at 1 mg/kg on day 0 and taken down day 3 (60h). Target mRNA level (% of saline control) were measured in liver tissue. Blue is saline control, red, LNA 10, is the random mixture of stereoisomers. Green is stereo-defined isomers with same nucleobase sequence and design as LNA 10. Molecules created using Spartan 14,16 ([www.wavefun.com](http://www.wavefun.com)).

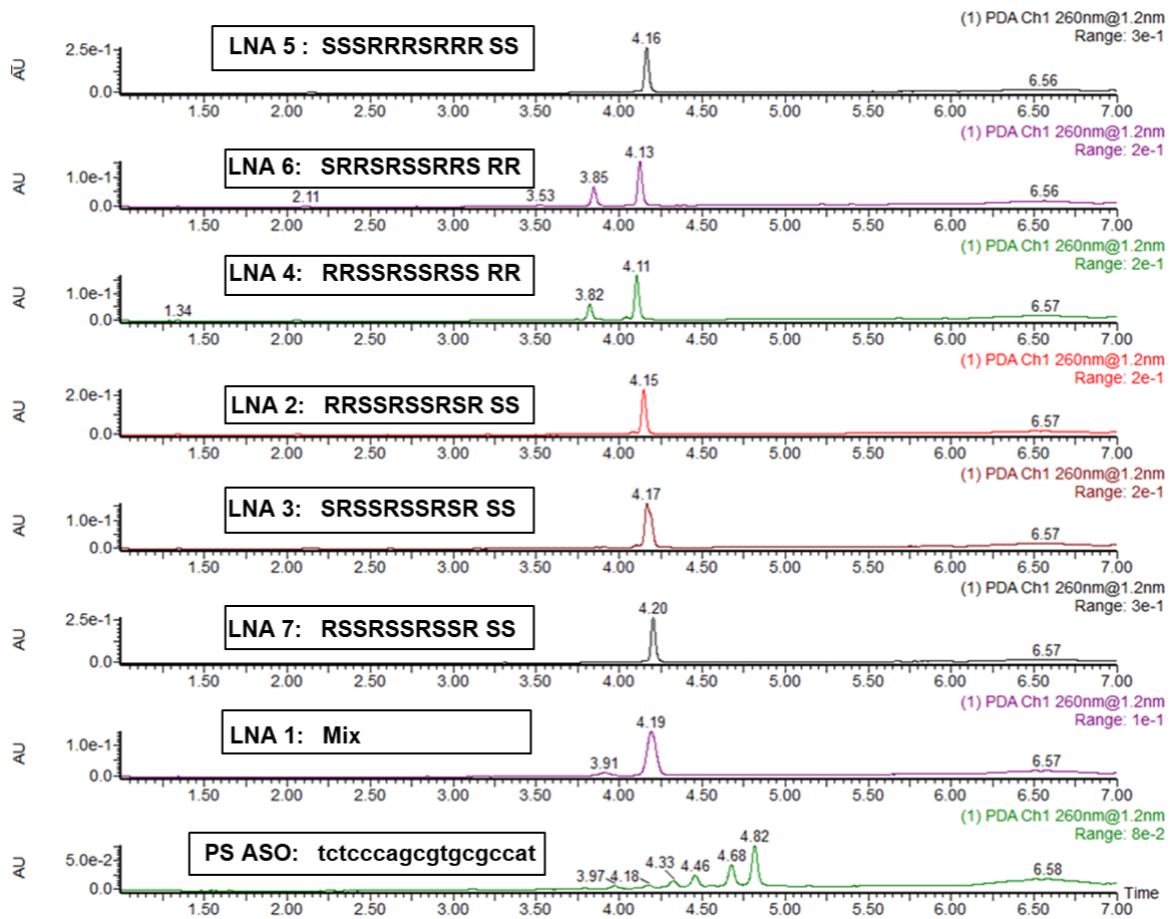

**Figure S3.** LNA nuclease stability after 4 hours at 37 °C in rat serum of the stereo-defined versions of the phosphorothioate random mixture LNA 1 (5'-G<sup>m</sup>CattggtatT<sup>m</sup>CA-3'). The R configuration of the 3' phosphorothioate linkages in combination with a 3'-purine LNA are more prone to be cleaved by 3' *exo* nucleases. The degradation products from LNA 4 and LNA 6 are identified as the n-1 (-A) sequences Mz 3968.

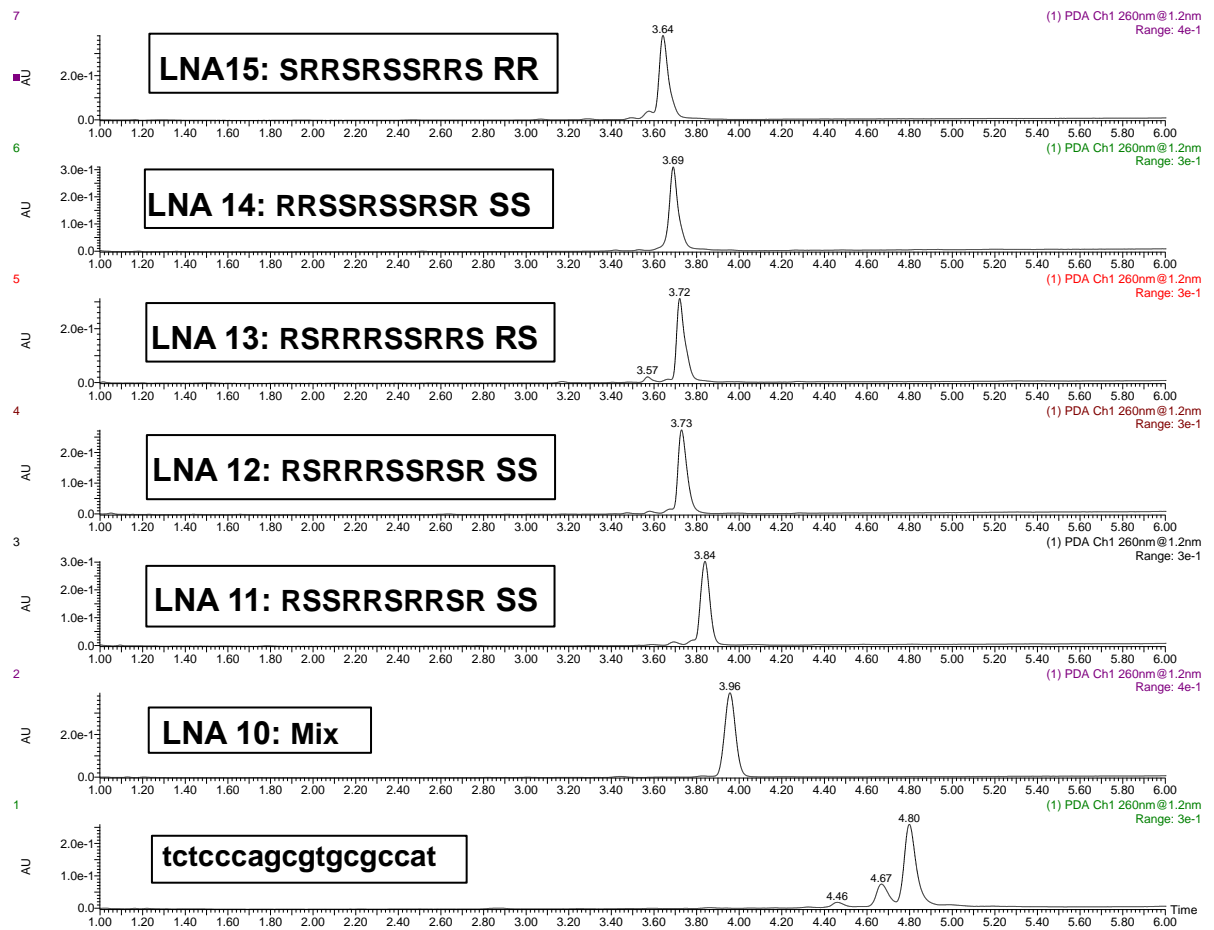

**Figure S4.** The stability after 4 hours at 37 °C in rat serum of LNA 10 (5' - G<sup>m</sup>CaagcatcctGT-3') and the stereo-specific versions the phosphorothioate LNA 10-15. The R configuration of the 3' phosphorothioate are more prone to be cleaved by 3' *exo* nuclease activity but is more stable with the 3'T base than seen above with the 3'A base (Fig. S3).

|        |                                           |                 | Cleaved target (%) |
|--------|-------------------------------------------|-----------------|--------------------|
| No.    | Sequence                                  | Chiral sequence | Serum (4 h)        |
| PS AON | ttcctccagcgtgcecat                        | Random mixture  | 44.6               |
| LNA 1  | G <sup>m</sup> CattggtatT <sup>m</sup> CA | Random mixture  | 5.6                |
| LNA 2  | G <sup>m</sup> CattggtatT <sup>m</sup> CA | RRSSRSSRSR SS   | 0                  |
| LNA 3  | G <sup>m</sup> CattggtatT <sup>m</sup> CA | SRSSRSSRSR SS   | 0                  |
| LNA 4  | G <sup>m</sup> CattggtatT <sup>m</sup> CA | RRSSRSSRSS RR   | 19.6               |
| LNA 5  | G <sup>m</sup> CattggtatT <sup>m</sup> CA | SSSRRRSRRR SS   | 0                  |
| LNA 6  | G <sup>m</sup> CattggtatT <sup>m</sup> CA | SRRSRSSRRS RR   | 19.2               |
| LNA 7  | G <sup>m</sup> CattggtatT <sup>m</sup> CA | RSSRSRSRSR SS   | 2.4                |
| LNA 10 | G <sup>m</sup> CaagcatcctGT               | Random mixture  | 1.3                |
| LNA 11 | G <sup>m</sup> CaagcatcctGT               | RSSRRSRRSR SS   | 0                  |
| LNA 12 | G <sup>m</sup> CaagcatcctGT               | RSRRRSSRSR SS   | 0                  |
| LNA 13 | G <sup>m</sup> CaagcatcctGT               | RSRRRSSRRS RS   | 0.9                |
| LNA 14 | G <sup>m</sup> CaagcatcctGT               | RRSSRSSRSR SS   | 0                  |
| LNA 15 | G <sup>m</sup> CaagcatcctGT               | SRRSRSSRRS RR   | 1.9                |

**Table S1.** Relative stabilities of stereo-defined isomers of LNA 1 (random mixture) and LNA 10 (random mixture) after 4 hours in rat serum at 37<sup>o</sup>.

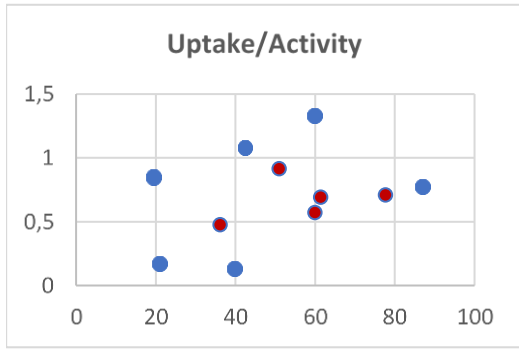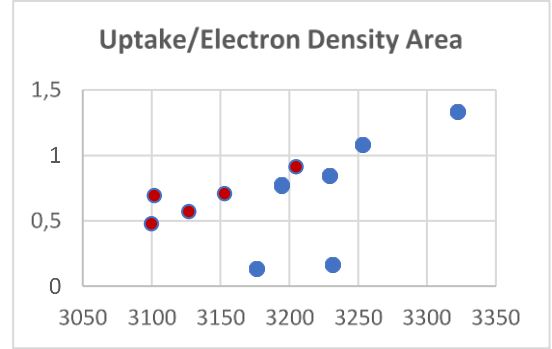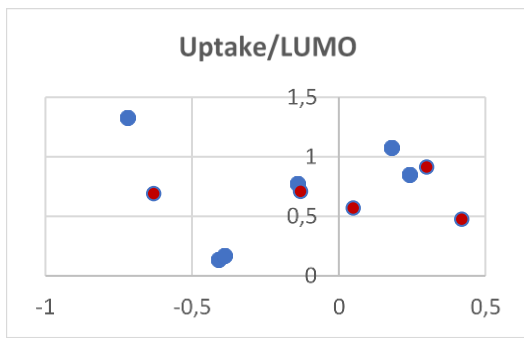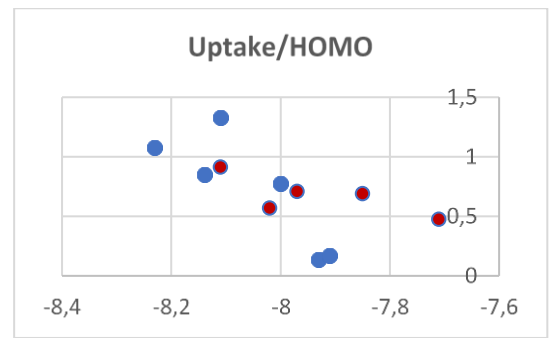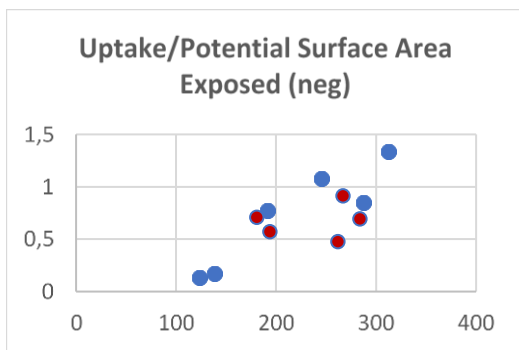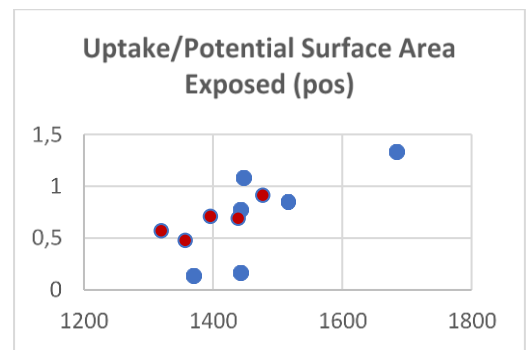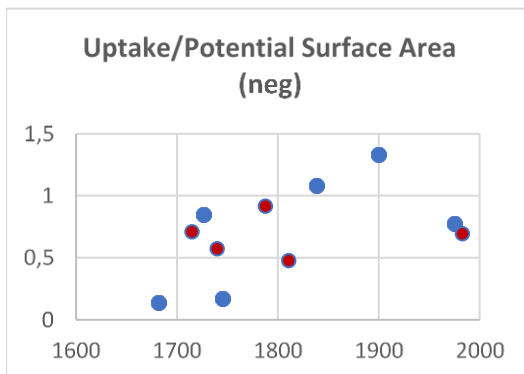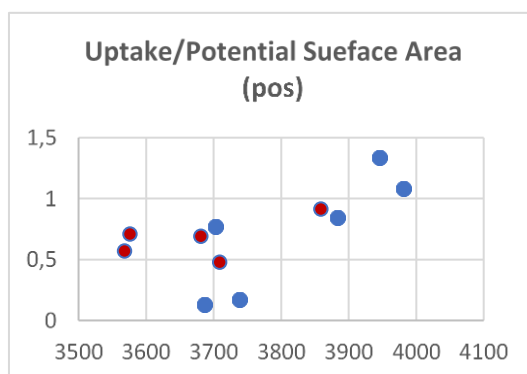

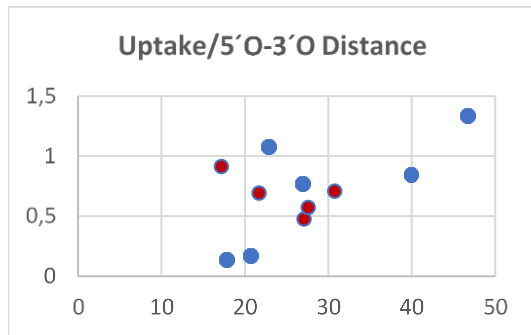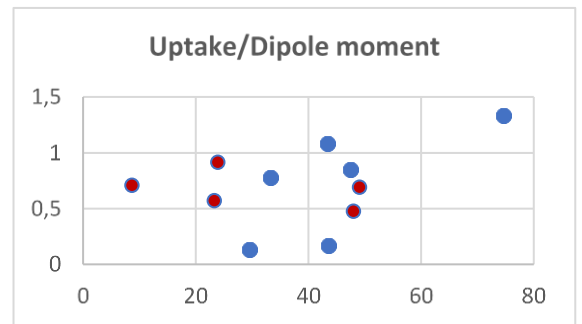

**Figure S5.** The relations between the calculated structural parameters and liver uptake of the 11 stereospecific LNA oligonucleotides. Red dots are LNAs with the Hif-1-alpha motive and blue dots are LNAs with the ApoB motive.



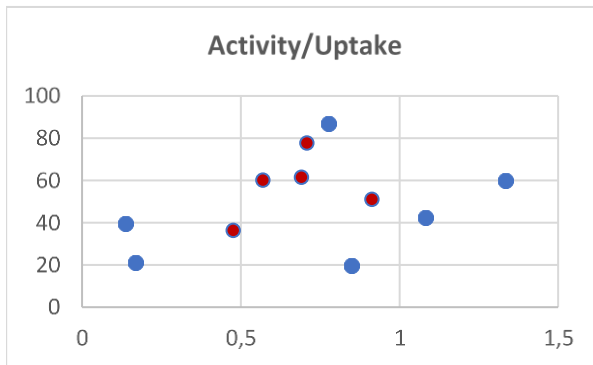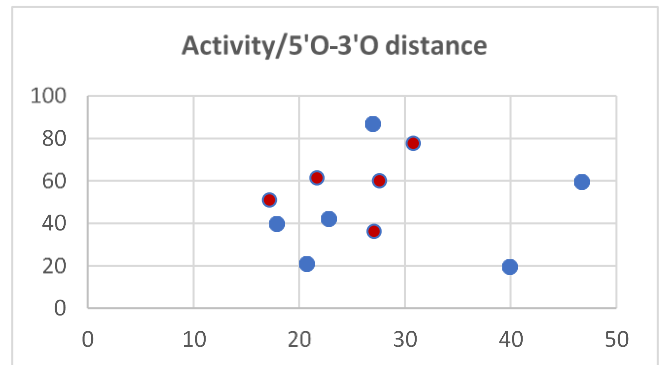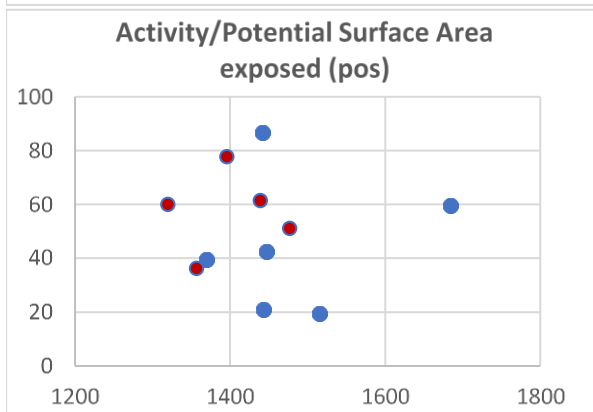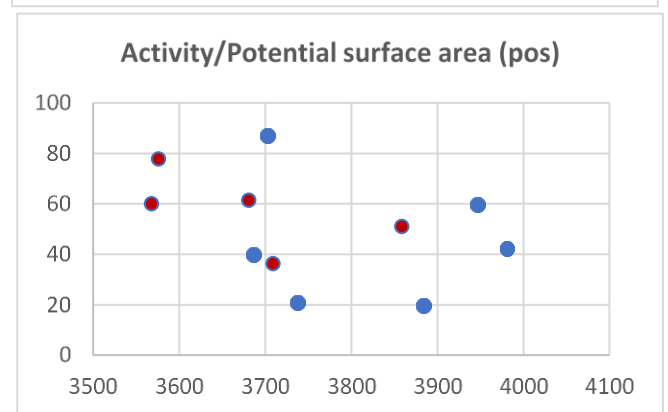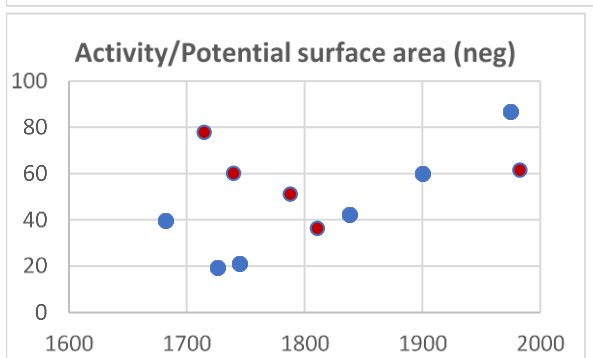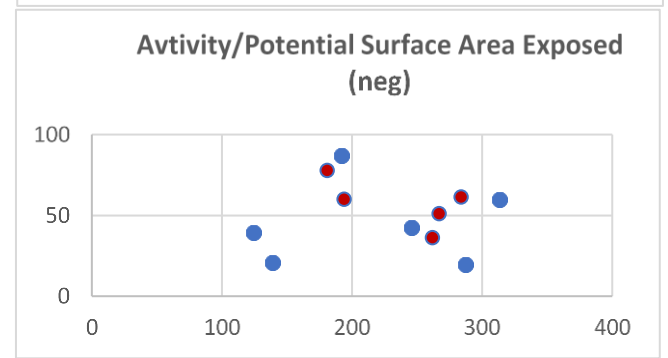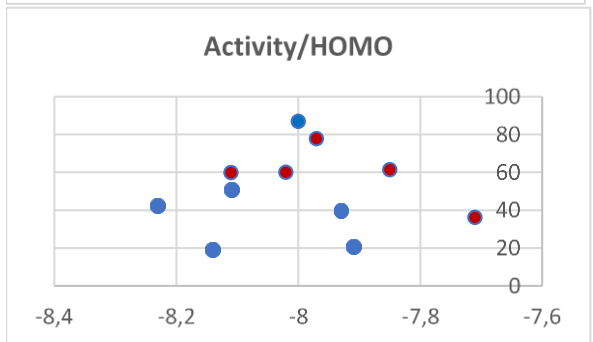

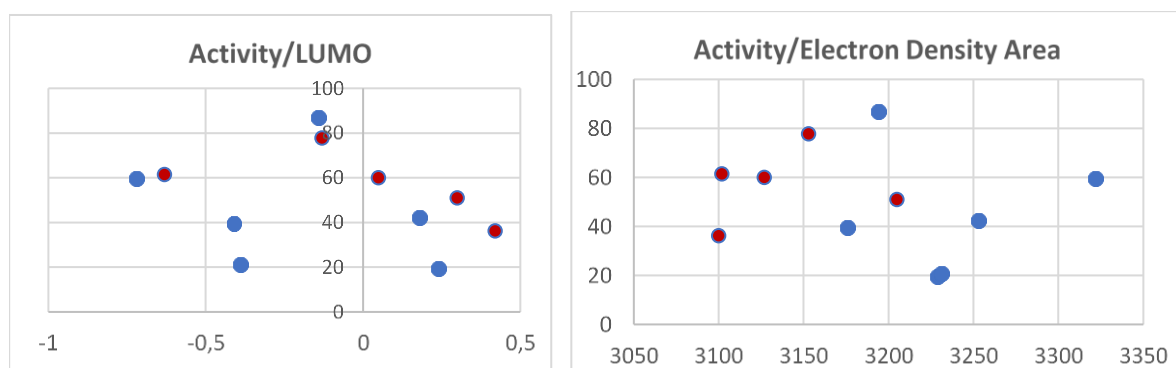

**Figure S6.** The relations between the mRNA downregulation in the liver and the calculated structure parameters of the 11 stereospecific LNA oligonucleotides. Red dots are LNAs with the Hif-1-alpha motive and blue dots are LNAs with the ApoB motive.
